# Supplementary material
Source: publisher site journal article supplement (https://www.spandidos-publications.com/6800/downloadSupplementary)
Supplement: Supplementary file 1 [file downloadSupplementary]

## Sheet: Sheet1
Table SVII. GO annotation analysis of cellular components for targets of downregulated piwi-interacting RNAs.
Term	Overlap	P-value	Adjusted P-value	Odds Ratio	Combined Score	Genes
Hrd1p Ubiquitin Ligase ERAD-L Complex (GO:0000839)	45414	0.0040047	0.319201	32.0852	177.119	RHBDD2;DERL3
Mitochondrial Respiratory Chain Complex IV (GO:0005751)	42795	0.00466417	0.319201	10.3327	55.4643	COX4I1;MTCO2P12;COX6A1
Aggresome (GO:0016235)	12875	0.00546766	0.319201	6.23178	32.4607	TRIM37;CARD14;HSPA1B;HSPA1A
Respiratory Chain Complex IV (GO:0045277)	43525	0.00644851	0.319201	9.04018	45.5978	COX4I1;MTCO2P12;COX6A1
Hrd1p Ubiquitin Ligase Complex (GO:0000836)	45475	0.00818457	0.324109	19.2491	92.5018	RHBDD2;DERL3
Outer Dynein Arm (GO:0036157)	45506	0.010766	0.355277	16.0401	72.6837	DNAH17;DNAH5
Apical Dendrite (GO:0097440)	45537	0.0136561	0.386271	13.748	59.0279	NEURL1;PTK2B
Caveola (GO:0005901)	22737	0.037996	0.749666	3.32618	10.8775	CAV3;FLOT2;RANGRF;TGFBR2
Brush Border Membrane (GO:0031526)	14671	0.0480579	0.749666	3.90507	11.8533	SLC34A1;LRP2;MFSD10
Vesicle (GO:0031982)	9/235	0.0531739	0.749666	1.92793	5.65691	BIN1;MYO15A;PEG10;SLC34A1;CLEC16A;FLOT2;HSPA1B;STX10;HSPA1A
GABA-ergic Synapse (GO:0098982)	43497	0.056737	0.749666	5.65804	16.2348	LRFN5;SLITRK2
Cortical Actin Cytoskeleton (GO:0030864)	16132	0.0607391	0.749666	3.52337	9.86955	COTL1;FLOT2;SHROOM4
Motile Cilium (GO:0031514)	26755	0.0624581	0.749666	2.79435	7.74944	CFAP251;RSPH1;DNAH17;DNAH5
Basement Membrane (GO:0005604)	16862	0.0676063	0.749666	3.35915	9.04972	CD151;COL4A6;COL4A5
Glutamatergic Synapse (GO:0098978)	28581	0.0757597	0.749666	2.60487	6.72106	LRFN5;TRIO;SLITRK2;CADPS
Plasma Membrane Raft (GO:0044853)	30042	0.087342	0.749666	2.47078	6.02358	CAV3;FLOT2;RANGRF;TGFBR2
Microbody Membrane (GO:0031903)	19419	0.0942084	0.749666	2.88783	6.82177	PEX5;TRIM37;MPV17
Peroxisomal Membrane (GO:0005778)	19419	0.0942084	0.749666	2.88783	6.82177	PEX5;TRIM37;MPV17
Apicolateral Plasma Membrane (GO:0016327)	45413	0.0981617	0.749666	12.0018	27.8579	MTCL1
Focal Adhesion (GO:0005925)	12/387	0.101488	0.749666	1.5489	3.54359	CD151;CAV3;PTPRA;FLOT2;PTK2B;ITGB6;ARHGEF7;HSPA1B;MPZL1;SHROOM4;HSPA1A;TGM2
Ficolin-1-Rich Granule Lumen (GO:1904813)	5/123	0.108179	0.749666	2.04239	4.54222	GSDMD;COTL1;GUSB;HSPA1B;HSPA1A
Cell-Substrate Junction (GO:0030055)	12/395	0.113197	0.749666	1.51591	3.30261	CD151;CAV3;PTPRA;FLOT2;PTK2B;ITGB6;ARHGEF7;HSPA1B;MPZL1;SHROOM4;HSPA1A;TGM2
G Protein-Coupled Receptor Dimeric Complex (GO:0038037)	45444	0.116609	0.749666	9.60098	20.6318	RAMP2
Flotillin Complex (GO:0016600)	45444	0.116609	0.749666	9.60098	20.6318	FLOT2
Vacuolar Membrane (GO:0005774)	21610	0.11987	0.749666	2.57763	5.46806	NPRL2;VPS4A;TECPR1
Nuclear Inner Membrane (GO:0005637)	11355	0.131803	0.749666	3.31475	6.71716	SMAD3;MFSD10
HFE-transferrin Receptor Complex (GO:1990712)	45474	0.13468	0.749666	8.00041	16.0397	TFR2
NMDA Selective Glutamate Receptor Complex (GO:0017146)	45474	0.13468	0.749666	8.00041	16.0397	PTK2B
RISC-loading Complex (GO:0070578)	45474	0.13468	0.749666	8.00041	16.0397	AGO2
Mitochondrial Proton-Transporting ATP Synthase Complex, Coupling Factor F(o) (GO:0000276)	45474	0.13468	0.749666	8.00041	16.0397	ATP5PO
Actin Cytoskeleton (GO:0015629)	10/327	0.135274	0.749666	1.52384	3.04837	MACF1;NOTCH3;BIN1;MYO15A;COTL1;FLOT2;BAIAP2;SHROOM4;MYLK;AMOT
Cortical Cytoskeleton (GO:0030863)	23071	0.138246	0.749666	2.4053	4.75941	COTL1;FLOT2;SHROOM4
Collagen-Containing Extracellular Matrix (GO:0062023)	11/373	0.144747	0.749666	1.46811	2.83751	COL16A1;CD151;COL7A1;ADAM11;COL4A6;COL10A1;COL4A5;PRG4;COL6A6;FBLN5;TGM2
trans-Golgi Network Membrane (GO:0032588)	4/100	0.148798	0.749666	2.00566	3.82111	ARL1;SCAMP3;AP1M1;STX10
Phosphatidylinositol 3-Kinase Complex, Class I (GO:0097651)	45505	0.152382	0.749666	6.85714	12.9008	PIK3R2
Phosphatidylinositol 3-Kinase Complex, Class IA (GO:0005943)	45505	0.152382	0.749666	6.85714	12.9008	PIK3R2
Cilium (GO:0005929)	8/257	0.158008	0.749666	1.5497	2.85936	CLXN;NEK8;CFAP251;RSPH1;DNAH17;DNAH5;CFAP47;CCDC40
Cul3-RING Ubiquitin Ligase Complex (GO:0031463)	12816	0.160153	0.749666	2.91237	5.33436	ZSWIM8;KEAP1
9+2 Motile Cilium (GO:0097729)	25628	0.172453	0.749666	2.15322	3.78457	CFAP251;DNAH17;DNAH5
Vesicle Coat (GO:0030120)	13547	0.174715	0.749666	2.74567	4.79009	COPB2;SEC24D
Actin Filament (GO:0005884)	25993	0.177524	0.749666	2.12145	3.66724	COTL1;SHROOM4;AMOT
Preribosome, Small Subunit Precursor (GO:0030688)	45566	0.186709	0.749666	5.33279	8.9495	LTB4R2
Neuromuscular Junction (GO:0031594)	14277	0.189477	0.749666	2.59699	4.32006	CAV3;RAPSN
Adherens Junction (GO:0005912)	5/150	0.193914	0.749666	1.65978	2.72261	FLOT2;TNKS1BP1;FRMD4B;BAIAP2;SHROOM4
Organelle Inner Membrane (GO:0019866)	11/398	0.194215	0.749666	1.37148	2.24757	SMAD3;COX4I1;ATP5PO;NDUFAF3;MTCO2P12;MPV17;CYP2E1;SDSL;COX6A1;SLC8B1;MFSD10
AP-1 Adaptor Complex (GO:0030121)	45597	0.203349	0.749666	4.79926	7.64442	AP1M1
TRAPPIII Protein Complex (GO:1990072)	45597	0.203349	0.749666	4.79926	7.64442	TRAPPC6A
U2-type Catalytic Step 1 Spliceosome (GO:0071006)	45597	0.203349	0.749666	4.79926	7.64442	PRPF8
Coated Vesicle (GO:0030135)	28915	0.21941	0.749666	1.89736	2.87794	COL7A1;PHETA1;AP1M1
90S Preribosome (GO:0030686)	45627	0.21965	0.749666	4.36275	6.61271	LTB4R2
COPI Vesicle Coat (GO:0030126)	45627	0.21965	0.749666	4.36275	6.61271	COPB2
RNA Polymerase I Complex (GO:0005736)	45627	0.21965	0.749666	4.36275	6.61271	POLR2F
Endoplasmic Reticulum Lumen (GO:0005788)	8/284	0.227195	0.749666	1.39615	2.06902	ADAMTSL1;COL16A1;H6PD;COL7A1;COL4A6;COL10A1;COL4A5;FSTL3
Lytic Vacuole Membrane (GO:0098852)	8/287	0.235494	0.749666	1.38092	1.99691	SZT2;NPRL2;LRP2;SLC37A3;TECPR1;LRRC8E;SIDT2;AP1M1
ATAC Complex (GO:0140672)	41275	0.235617	0.749666	3.99898	5.78071	MBIP
ISWI-type Complex (GO:0031010)	41275	0.235617	0.749666	3.99898	5.78071	BAZ1B
RISC Complex (GO:0016442)	41275	0.235617	0.749666	3.99898	5.78071	AGO2
Clathrin Coat Of trans-Golgi Network Vesicle (GO:0030130)	41275	0.235617	0.749666	3.99898	5.78071	AP1M1
Lamellar Body (GO:0042599)	41275	0.235617	0.749666	3.99898	5.78071	ABCA3
Septin Cytoskeleton (GO:0032156)	41275	0.235617	0.749666	3.99898	5.78071	SEPTIN8
Septin Ring (GO:0005940)	41275	0.235617	0.749666	3.99898	5.78071	SEPTIN8
Cell-Cell Contact Zone (GO:0044291)	17199	0.249764	0.749666	2.13443	2.96096	FLOT2;RANGRF
RNA Polymerase II, Core Complex (GO:0005665)	41640	0.251259	0.749666	3.69118	5.09851	POLR2F
Spindle (GO:0005819)	6/210	0.260555	0.749666	1.4149	1.90296	ESPL1;SLC34A1;SPICE1;MBIP;KIF2C;TUBGCP3
U2-type Precatalytic Spliceosome (GO:0071005)	17930	0.264981	0.749666	2.04339	2.71382	PHF5A;PRPF8
Heterochromatin (GO:0000792)	17930	0.264981	0.749666	2.04339	2.71382	TNKS1BP1;BAZ1B
Voltage-Gated Calcium Channel Complex (GO:0005891)	17930	0.264981	0.749666	2.04339	2.71382	PDE4B;CACNA2D4
COPII Vesicle Coat (GO:0030127)	42005	0.266582	0.749666	3.42735	4.53121	SEC24D
Peroxisome (GO:0005777)	4/129	0.271194	0.749666	1.53805	2.00704	SZT2;PEX5;TRIM37;MPV17
COPI-coated Vesicle Membrane (GO:0030663)	42370	0.281591	0.749666	3.19869	4.0537	COPB2
Dense Core Granule (GO:0031045)	42370	0.281591	0.749666	3.19869	4.0537	SLC6A9
Precatalytic Spliceosome (GO:0071011)	19025	0.287799	0.749666	1.92049	2.39196	PHF5A;PRPF8
RNA Polymerase III Complex (GO:0005666)	42736	0.296294	0.749666	2.99862	3.64753	POLR2F
Endoribonuclease Complex (GO:1902555)	42736	0.296294	0.749666	2.99862	3.64753	AGO2
Polymeric Cytoskeletal Fiber (GO:0099513)	7/265	0.299744	0.749666	1.30482	1.57209	MACF1;AKNA;COTL1;KRT7;KIF2C;SHROOM4;AMOT
Lysosomal Membrane (GO:0005765)	9/356	0.306177	0.749666	1.24781	1.4769	SZT2;NPRL2;CLEC16A;LRP2;SLC37A3;TECPR1;LRRC8E;SIDT2;AP1M1
GABA-A Receptor Complex (GO:1902711)	43101	0.310697	0.749666	2.82209	3.29884	GABRR2
High-Density Lipoprotein Particle (GO:0034364)	43101	0.310697	0.749666	2.82209	3.29884	LCAT
Mitochondrial Proton-Transporting ATP Synthase Complex (GO:0005753)	43101	0.310697	0.749666	2.82209	3.29884	ATP5PO
Proton-Transporting ATP Synthase Complex (GO:0045259)	43101	0.310697	0.749666	2.82209	3.29884	ATP5PO
Ficolin-1-Rich Granule (GO:0101002)	5/184	0.324213	0.749666	1.34216	1.51176	GSDMD;COTL1;GUSB;HSPA1B;HSPA1A
U5 snRNP (GO:0005682)	43466	0.324806	0.749666	2.66517	2.99705	PRPF8
Clathrin Adaptor Complex (GO:0030131)	43466	0.324806	0.749666	2.66517	2.99705	AP1M1
Endolysosome Membrane (GO:0036020)	43466	0.324806	0.749666	2.66517	2.99705	CLEC16A
Nuclear Outer Membrane (GO:0005640)	43466	0.324806	0.749666	2.66517	2.99705	SYNE3
Spliceosomal snRNP Complex (GO:0097525)	20852	0.325613	0.749666	1.74545	1.95848	PHF5A;PRPF8
Calcium Channel Complex (GO:0034704)	21582	0.340602	0.764561	1.68404	1.81378	PDE4B;CACNA2D4
Cytoskeleton (GO:0005856)	14/599	0.342928	0.764561	1.1515	1.23238	NOTCH3;MACF1;MTCL1;KRT7;AMBRA1;BAIAP2;SHROOM4;MYLK;SEPTIN8;BIN1;MYO15A;TAF1A;KIF2C;RELL1
Mitochondrial Inner Membrane (GO:0005743)	9/370	0.34596	0.764561	1.19855	1.27217	COX4I1;ATP5PO;NDUFAF3;MTCO2P12;MPV17;CYP2E1;SDSL;COX6A1;SLC8B1
Sperm Flagellum (GO:0036126)	21947	0.348058	0.764561	1.65492	1.74658	CFAP251;DNAH17
Pericentric Heterochromatin (GO:0005721)	44197	0.352166	0.764561	2.39841	2.50311	BAZ1B
Specific Granule Lumen (GO:0035580)	22313	0.355486	0.764561	1.62679	1.68254	GSDMD;PDXK
Cell Projection Membrane (GO:0031253)	3/105	0.363603	0.764561	1.41184	1.42835	SLC34A1;LRP2;MFSD10
Apical Junction Complex (GO:0043296)	3/106	0.369177	0.764561	1.39806	1.39313	FRMD4B;SHROOM4;AMOT
trans-Golgi Network (GO:0005802)	6/241	0.371248	0.764561	1.22629	1.21512	TRAPPC6A;ARL1;PHETA1;SCAMP3;STX10;AP1M1
Endocytic Vesicle (GO:0030139)	5/196	0.37276	0.764561	1.25706	1.24049	MSR1;SPHK1;DAB2IP;FLOT2;AMOT
Endoplasmic Reticulum Membrane (GO:0005789)	18/801	0.374651	0.764561	1.1058	1.08563	NOTCH3;SREBF1;COPB2;ANKLE2;DERL3;CHERP;HERPUD1;CYB5R2;TYRO3;CYP2E1;PIGG;SEC24D;EXTL3;SLC37A3;SLC27A5;LRRC8E;RAPSN;LPIN3
Cul2-RING Ubiquitin Ligase Complex (GO:0031462)	44927	0.378419	0.764561	2.18015	2.11856	ZSWIM8
Pigment Granule (GO:0048770)	45292	0.391145	0.78229	2.08525	1.95738	SGSM2
Microtubule Cytoskeleton (GO:0015630)	8/342	0.400323	0.791238	1.15024	1.05302	MACF1;AKNA;TAF1A;SPICE1;KIF2C;RELL1;TUBGCP3;SEPTIN8
U2 snRNP (GO:0005686)	45658	0.403611	0.791238	1.99826	1.81303	PHF5A
Intermediate Filament (GO:0005882)	25235	0.413669	0.795208	1.43196	1.26397	MACF1;KRT7
Vesicle Membrane (GO:0012506)	25235	0.413669	0.795208	1.43196	1.26397	MFSD10;AP1M1
Early Endosome Membrane (GO:0031901)	3/116	0.424288	0.798362	1.27368	1.09198	SPHK1;LDLRAD4;SNX8
Sarcoplasmic Reticulum Membrane (GO:0033017)	46388	0.427784	0.798362	1.84436	1.56611	CHERP
Early Endosome (GO:0005769)	7/307	0.439055	0.798362	1.11971	0.921668	SPHK1;VPS4A;LDLRAD4;VPS26B;SNX8;PHETA1;AP1M1
U12-type Spliceosomal Complex (GO:0005689)	46753	0.439502	0.798362	1.77596	1.46004	PHF5A
Condensed Nuclear Chromosome (GO:0000794)	46753	0.439502	0.798362	1.77596	1.46004	SMC4
Endolysosome (GO:0036019)	46753	0.439502	0.798362	1.77596	1.46004	CLEC16A
U2-type Catalytic Step 2 Spliceosome (GO:0071007)	47119	0.45098	0.805269	1.71245	1.36368	PRPF8
Lysosome (GO:0005764)	11/503	0.453525	0.805269	1.07289	0.84834	RAMP2;SZT2;NPRL2;VPS4A;LRP2;GUSB;SLC37A3;LRRC8E;TECPR1;AP1M1;SIDT2
Rough Endoplasmic Reticulum (GO:0005791)	10959	0.462224	0.805269	1.65331	1.27587	RANGRF
COPII-coated ER To Golgi Transport Vesicle (GO:0030134)	27791	0.462365	0.805269	1.29604	0.999762	COL7A1;SEC24D
Cytoplasmic Side Of Plasma Membrane (GO:0009898)	3/124	0.467157	0.805269	1.18898	0.904924	G6PD;LCK;SHROOM4
Intercalated Disc (GO:0014704)	11324	0.473238	0.805269	1.59812	1.19564	RANGRF
Melanosome (GO:0042470)	11324	0.473238	0.805269	1.59812	1.19564	SGSM2
Clathrin-Coated Vesicle (GO:0030136)	28522	0.475841	0.805269	1.2618	0.937104	PHETA1;AP1M1
Ionotropic Glutamate Receptor Complex (GO:0008328)	12055	0.494596	0.824719	1.49809	1.05467	PTK2B
Intermediate Filament Cytoskeleton (GO:0045111)	29618	0.495664	0.824719	1.2137	0.851841	MACF1;KRT7
U4/U6 X U5 tri-snRNP Complex (GO:0046540)	12785	0.515089	0.838343	1.40982	0.935295	PRPF8
Autophagosome Membrane (GO:0000421)	12785	0.515089	0.838343	1.40982	0.935295	TECPR1
Monoatomic Ion Channel Complex (GO:0034702)	13150	0.525023	0.838343	1.36947	0.882366	LRRC8E
Spliceosomal tri-snRNP Complex (GO:0097526)	13150	0.525023	0.838343	1.36947	0.882366	PRPF8
Supramolecular Fiber (GO:0099512)	13150	0.525023	0.838343	1.36947	0.882366	FBLN5
SAGA-type Complex (GO:0070461)	13881	0.544286	0.862148	1.29531	0.787913	MBIP
U2-type Spliceosomal Complex (GO:0005684)	32905	0.552187	0.863128	1.08907	0.646762	PHF5A;PRPF8
Keratin Filament (GO:0045095)	14246	0.553623	0.863128	1.26116	0.745688	KRT7
Mitotic Spindle (GO:0072686)	3/143	0.562595	0.870264	1.02662	0.590507	ESPL1;SLC34A1;MBIP
Tight Junction (GO:0070160)	34001	0.570011	0.8749	1.053	0.591892	FRMD4B;AMOT
Intracellular Organelle Lumen (GO:0070013)	17/856	0.584582	0.890364	0.969278	0.520364	GSDMD;DMGDH;COL16A1;H6PD;HIBADH;MTERF2;GPT2;FSTL3;ADAMTSL1;COL7A1;COTL1;COL4A6;COL10A1;COL4A5;GUSB;HSPA1B;HSPA1A
Sarcoplasmic Reticulum (GO:0016529)	16438	0.605771	0.896762	1.08885	0.545789	CHERP
Axon (GO:0030424)	4/205	0.606578	0.896762	0.952767	0.476309	BIN1;DAB2IP;LRP2;CPT1C
Recycling Endosome (GO:0055037)	3/159	0.634411	0.896762	0.920567	0.418911	AVL9;PHETA1;SCAMP3
Specific Granule (GO:0042581)	3/159	0.634411	0.896762	0.920567	0.418911	GSDMD;PDXK;AP1M1
Microbody Lumen (GO:0031907)	17899	0.637113	0.896762	0.997906	0.449864	PEX5
Peroxisomal Matrix (GO:0005782)	17899	0.637113	0.896762	0.997906	0.449864	PEX5
Golgi Membrane (GO:0000139)	8/427	0.648346	0.896762	0.912849	0.395565	NOTCH3;SREBF1;COPB2;XYLT2;LDLRAD4;PI4KB;LARGE2;AP1M1
Dendrite (GO:0030425)	5/270	0.649853	0.896762	0.902578	0.38902	BIN1;NEURL1;PTK2B;LRP2;CPT1C
Endoplasmic reticulum-Golgi Intermediate Compartment Membrane (GO:0033116)	18994	0.658978	0.896762	0.939062	0.39165	COL7A1
Sarcolemma (GO:0042383)	18994	0.658978	0.896762	0.939062	0.39165	CAV3
Exocytic Vesicle Membrane (GO:0099501)	19360	0.66597	0.896762	0.920956	0.374379	RPH3A
Tertiary Granule Lumen (GO:1904724)	19360	0.66597	0.896762	0.920956	0.374379	GSDMD
Mitochondrial Membrane (GO:0031966)	10/540	0.669423	0.896762	0.901357	0.36175	COX4I1;ATP5PO;NDUFAF3;MTCO2P12;MPV17;CYP2E1;AMBRA1;SDSL;COX6A1;SLC8B1
Lytic Vacuole (GO:0000323)	4/223	0.671887	0.896762	0.873646	0.347418	RAMP2;VPS4A;LRP2;SIDT2
Synaptic Vesicle Membrane (GO:0030672)	19725	0.672819	0.896762	0.903533	0.358051	RPH3A
Membrane Raft (GO:0045121)	3/169	0.674938	0.896762	0.864666	0.33993	CAV3;LCK;TGFBR2
ER To Golgi Transport Vesicle Membrane (GO:0012507)	20090	0.679528	0.896762	0.886756	0.342604	SEC24D
Coated Vesicle Membrane (GO:0030662)	20090	0.679528	0.896762	0.886756	0.342604	SEC24D
Cytoplasmic Vesicle Lumen (GO:0060205)	2/115	0.684894	0.896762	0.847035	0.320595	PDXK;COTL1
Nuclear Membrane (GO:0031965)	4/227	0.685341	0.896762	0.857798	0.32411	RAP1GAP2;SMAD3;SYNE3;MFSD10
Extracellular Membrane-Bounded Organelle (GO:0065010)	20821	0.692537	0.896762	0.854998	0.314121	PEG10
cullin-RING Ubiquitin Ligase Complex (GO:0031461)	3/174	0.693923	0.896762	0.839167	0.306627	ZSWIM8;KEAP1;ANAPC1
cis-Golgi Network (GO:0005801)	21916	0.711069	0.896762	0.811399	0.276675	TRAPPC6A
Condensed Chromosome (GO:0000793)	21916	0.711069	0.896762	0.811399	0.276675	SMC4
Extracellular Vesicle (GO:1903561)	21916	0.711069	0.896762	0.811399	0.276675	PEG10
Serine/Threonine Protein Kinase Complex (GO:1902554)	21916	0.711069	0.896762	0.811399	0.276675	TGFBR2
Transport Vesicle Membrane (GO:0030658)	21916	0.711069	0.896762	0.811399	0.276675	SEC24D
Cell-Cell Junction (GO:0005911)	5/299	0.734836	0.920871	0.812327	0.250284	TNKS1BP1;FLOT2;FRMD4B;BAIAP2;SHROOM4
Platelet Alpha Granule Lumen (GO:0031093)	24108	0.744857	0.927558	0.736275	0.216879	IGF2
Endosome Membrane (GO:0010008)	6/361	0.750707	0.927807	0.806738	0.231324	SPHK1;VPS4A;CLEC16A;LDLRAD4;SNX8;SCAMP3
Clathrin-Coated Endocytic Vesicle Membrane (GO:0030669)	24838	0.75522	0.927807	0.714223	0.200516	LRP2
Asymmetric Synapse (GO:0032279)	2/133	0.759115	0.927807	0.729974	0.201182	NEURL1;PTK2B
Recycling Endosome Membrane (GO:0055038)	25569	0.765163	0.929461	0.69345	0.185614	SCAMP3
Secretory Granule Lumen (GO:0034774)	5/316	0.777165	0.933642	0.767247	0.193425	GSDMD;PDXK;IGF2;COTL1;GUSB
Small-Subunit Processome (GO:0032040)	26665	0.779326	0.933642	0.664454	0.165665	UTP14A
Late Endosome (GO:0005770)	3/205	0.793223	0.933642	0.70925	0.164298	VPS4A;CLEC16A;VPS26B
Extrinsic Component Of Cytoplasmic Side Of Plasma Membrane (GO:0031234)	28126	0.796895	0.933642	0.629354	0.142884	LCK
Neuron Projection (GO:0043005)	9/557	0.807426	0.933642	0.781875	0.167246	RPH3A;GABRR2;TENM4;BIN1;DAB2IP;PTK2B;LRP2;CPT1C;ARHGEF7
Bicellular Tight Junction (GO:0005923)	29587	0.813067	0.933642	0.597763	0.123702	FRMD4B
Postsynaptic Density (GO:0014069)	2/151	0.817737	0.933642	0.641195	0.129018	NEURL1;PTK2B
Autophagosome (GO:0005776)	30317	0.820665	0.933642	0.583124	0.115249	TECPR1
Actin-Based Cell Projection (GO:0098858)	30682	0.824348	0.933642	0.576069	0.111275	MYO15A
Clathrin-Coated Endocytic Vesicle (GO:0045334)	31048	0.827955	0.933642	0.569182	0.107459	LRP2
Lysosomal Lumen (GO:0043202)	31413	0.831488	0.933642	0.562457	0.103795	GUSB
Endocytic Vesicle Membrane (GO:0030666)	2/159	0.839438	0.933642	0.608272	0.106461	MSR1;LRP2
Azurophil Granule Lumen (GO:0035578)	32509	0.84166	0.933642	0.543199	0.0936362	GUSB
Platelet Alpha Granule (GO:0031091)	32509	0.84166	0.933642	0.543199	0.0936362	IGF2
Clathrin-Coated Vesicle Membrane (GO:0030665)	32874	0.844912	0.933642	0.537068	0.0905079	LRP2
Specific Granule Membrane (GO:0035579)	32874	0.844912	0.933642	0.537068	0.0905079	AP1M1
Chromosome (GO:0005694)	2/164	0.851788	0.933642	0.589347	0.0945418	RRP1;ZFX
Bounding Membrane Of Organelle (GO:0098588)	13/819	0.859802	0.933642	0.765111	0.115572	NOTCH3;MSR1;SREBF1;COPB2;NPRL2;VPS4A;XYLT2;LDLRAD4;CHERP;COL7A1;PI4KB;LARGE2;AP1M1
Nuclear Chromosome (GO:0000228)	34700	0.860202	0.933642	0.50837	0.0765545	SMC4
Organelle Outer Membrane (GO:0031968)	2/170	0.865463	0.933642	0.568123	0.0820884	AMBRA1;SYNE3
Basolateral Plasma Membrane (GO:0016323)	2/171	0.867627	0.933642	0.564733	0.0801884	SLC6A9;FLOT2
Microtubule (GO:0005874)	2/185	0.894741	0.957614	0.521153	0.0579633	MACF1;KIF2C
Cytoplasmic Vesicle Membrane (GO:0030659)	5/389	0.902377	0.960595	0.619037	0.0635891	MSR1;ABCA3;VPS4A;AP1M1;MFSD10
Mitochondrial Matrix (GO:0005759)	4/355	0.934436	0.985211	0.541381	0.0367122	DMGDH;HIBADH;MTERF2;GPT2
Mitochondrial Envelope (GO:0005740)	1/146	0.951574	0.985211	0.328702	0.016316	SLC8B1
Nucleolus (GO:0005730)	10/771	0.956115	0.985211	0.620144	0.02783	ALKBH2;LTB4R2;PHF1;RRP1;MBIP;POLR2F;BAZ1B;UTP14A;ZFX;WDR55
Mitochondrial Outer Membrane (GO:0005741)	1/151	0.956361	0.985211	0.317663	0.0141741	AMBRA1
Azurophil Granule (GO:0042582)	1/155	0.959848	0.985211	0.309349	0.0126772	GUSB
Vacuolar Lumen (GO:0005775)	1/161	0.964565	0.985211	0.297656	0.010739	GUSB
Tertiary Granule (GO:0070820)	1/162	0.965295	0.985211	0.295792	0.0104478	GSDMD
Intracellular Non-Membrane-Bounded Organelle (GO:0043232)	16/1195	0.976003	0.985211	0.635791	0.0154431	MACF1;MTCL1;PHF1;RRP1;SPICE1;AMBRA1;BAZ1B;ZFX;WDR55;ALKBH2;LTB4R2;BIN1;MBIP;TUBGCP3;KIF2C;UTP14A
Intracellular Membrane-Bounded Organelle (GO:0043231)	89/5175	0.97752	0.985211	0.793198	0.0180342	TENM4;PHF1;RRP1;TCF20;GIMAP4;MSANTD4;LDLRAD4;SMC4;ETS2;ALKBH2;TRIM7;ADAMTSL3;SALL4;MACROD1;PDE4B;TNKS1BP1;FLOT2;GUSB;CMTR2;TGM2;DUSP4;BRD2;SREBF1;DAXX;G6PD;SPHK1;STRBP;KRT7;TBR1;WRNIP1;BAZ1B;OVOL1;SCAMP3;PAX2;SHROOM4;TRAPPC6A;ESPL1;BIN1;TYRO3;CYP2E1;HNRNPH3;SFI1;PDXK;AKNA;VPS4A;PPM1H;ARHGAP19;PIK3R2;AMBRA1;FHIT;PRPF8;FSTL3;CYB5R2;NSD3;DHX30;TKFC;CBS;NACC1;ZNF746;HOXC4;POLR2F;PTK2B;SNX8;RAI2;AP1M1…
Secretory Granule Membrane (GO:0030667)	2/279	0.979198	0.985211	0.342632	0.00720273	ABCA3;AP1M1
Nuclear Lumen (GO:0031981)	9/780	0.980236	0.985211	0.549222	0.0109638	ALKBH2;LTB4R2;PHF1;RRP1;MBIP;BAZ1B;UTP14A;ZFX;WDR55
Nucleus (GO:0005634)	70/4487	0.996921	0.996921	0.709367	0.00218761	TENM4;PHF1;RRP1;TCF20;MSANTD4;SMC4;ETS2;ALKBH2;TRIM7;SALL4;MACROD1;PDE4B;TNKS1BP1;CMTR2;TGM2;DUSP4;BRD2;SREBF1;DAXX;SPHK1;STRBP;KRT7;TBR1;WRNIP1;BAZ1B;OVOL1;PAX2;ESPL1;BIN1;TYRO3;HNRNPH3;SFI1;PDXK;VPS4A;PPM1H;PIK3R2;AMBRA1;FHIT;PRPF8;FSTL3;CYB5R2;NSD3;DHX30;TKFC;CBS;NACC1;ZNF746;HOXC4;POLR2F;PTK2B;RAI2;SMAD3;ZFHX2;GTF2IRD2;HSPA7;MICAL3;ZNF76;RSPH1;PHF5A;ADI1;AGO2;BHLHE40;ATP5PO;NDUFAF3;RANGRF;HSP…
